# Supplementary material
Source: PubMed Central journal article supplement (PMC4853259)
Supplement: NIHMS750041-supplement-01.pdf [file NIHMS750041-supplement-01.pdf]

Supplemental Table 1. Patient Characteristics, n=360.

| Characteristic      | n (%)      |
|---------------------|------------|
| Age (years)         |            |
| ≤30                 | 72 (20)    |
| 31-35               | 148 (41.1) |
| 36-40               | 126 (35)   |
| >40                 | 14 (3.9)   |
| Race                |            |
| White               | 260 (75.8) |
| Black               | 41 (11.4)  |
| Other               | 42 (11.7)  |
| Missing             | 17 (4.7)   |
| Ethnicity           |            |
| Non-Hispanic        | 333 (92.5) |
| Hispanic            | 8 (2.2)    |
| Missing             | 19 (5.3)   |
| Gravidity           |            |
| Nulliparous         | 160 (44.4) |
| ≥1 prior pregnancy  | 200 (55.6) |
| Initial hCG         |            |
| ≤250                | 202 (56.1) |
| 251-500             | 113 (31.4) |
| ≥500                | 45 (12.5)  |
| No. Serial hCGs     |            |
| 2                   | 86 (23.9)  |
| 3                   | 203 (56.4) |
| ≥4                  | 71 (19.7)  |
| IVF Transfer Type   |            |
| Fresh transfer      | 291 (80.8) |
| Frozen transfer     | 69 (19.2)  |
| Embryos transferred |            |
| 1 or 2              | 221 (61.4) |
| ≥3                  | 139 (38.6) |

16

17 Supplemental figure 1. Box plots of hCG rise following "fresh" versus frozen/thawed embryo  
18 transfer cycles stratified by cut points in (A) absolute hCG value and (B) number of days from  
19 retrieval. ["fresh" ET n=291 and frozen/thawed ET n=69]. \* $p \leq 0.0001$ , + $p \leq 0.01$ .

20

21 Supplemental figure 2. Linear regression of hCG rise versus birth weight of singleton  
22 pregnancies following "fresh" embryo transfer cycles (2A) or following frozen/thawed embryo  
23 transfer cycles (2B). A statistical test for effect modification due to type of transfer (fresh vs  
24 frozen) was not statistically significant,  $p=0.263$ .

25

# Supplemental Figure 1

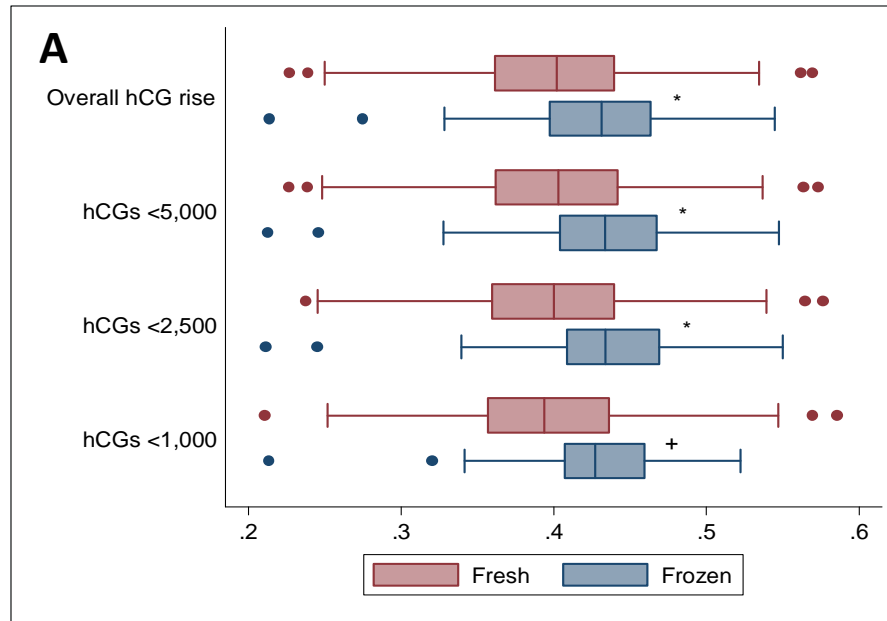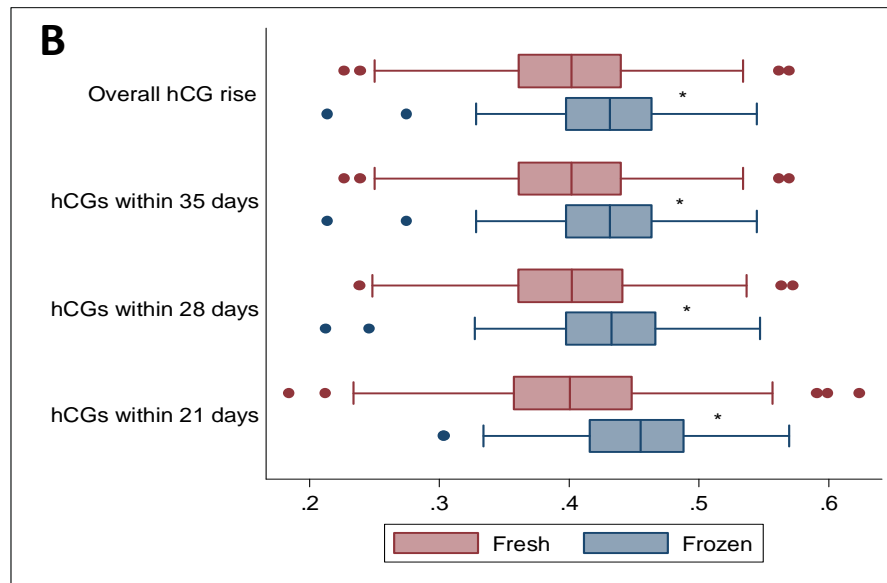

## Supplemental Figure 2

2A: Fresh only

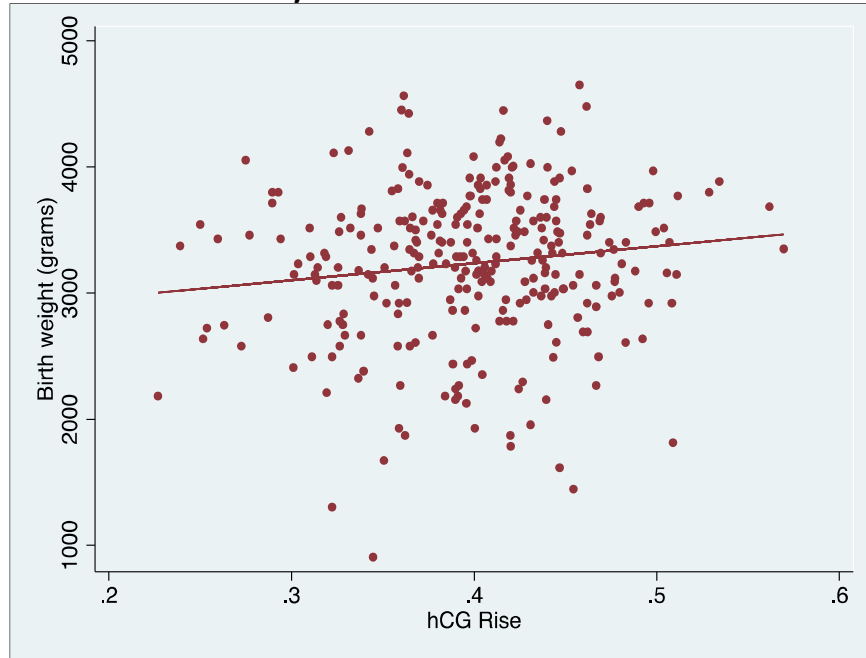

$$\text{Birthweight} = 2810 + 1066(\text{hcg slope})$$

2B: Frozen only

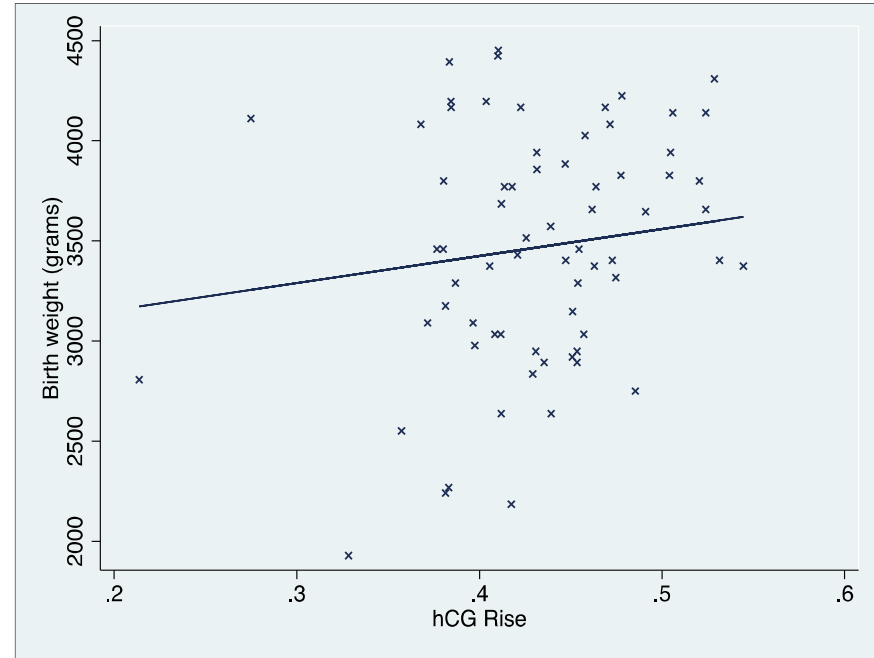

$$\text{Birthweight} = 2236 + 2621(\text{hcg slope})$$
